# Supplementary material
Source: PubMed Central journal article supplement (PMC9986032)
Supplement: NIHMS1869121-supplement-Supplementary_Figures_Legends.pdf [file NIHMS1869121-supplement-Supplementary_Figures_Legends.pdf]

**Figure S1. Combined sequencing analysis of ATAC-seq and RNA-seq.**

**A**, Correlation coefficient heatmap generated by hierarchical clustering of all ATAC-seq samples. **B**, Principal component analysis of ATAC-seq samples. Each point represents one ATAC-seq replicate of C4-2 or C4-2R. **C**, Venn diagram of consensus peaks identified by ATAC-seq between C4-2 and C4-2R. **D**, Average density plot (top) and chromatic accessibility heatmap (bottom) around the 1.5 kb upstream and downstream of each DAP. The shades of pink (C4-2) and purple (C4-2R) indicate signal intensity. **E**, Heatmap of normalized read density for DAPs. **F**, Pie chart of DAPs among different functional elements of the genome. **G**, Venn diagram of DEGs in RNA-seq and DAPs in ATAC-seq. A total of 114 genes are found to have the same trend in both cases.

**Figure S2. AhR-GSTM2 regulatory network accounts for resistance to ENZ.**

**A**, Chemical structure of GSTM2 inhibitor NBD. **B**,  $IC_{50}$  of NBD on different GST isoforms. The data are obtained from published literature (Giorgio et al. JBC 2005). **C**, IB to detect different GST isoforms in C4-2, C4-2R and 22Rv1. **D**, **E**, Viability assays in C4-2R and 22Rv1 treated with the indicated concentrations of NBD. Data are scaled into percentage and normalized to the untreated group (NBD = 0), then shown as mean  $\pm$  SD (n = 8). **F**, Reporter assay to detect the transcriptional activity of AhR in C4-2 and C4-2R. The data are normalized to C4-2 and shown as mean  $\pm$  SD (n = 4). The experiment is repeated twice, and one is shown. **G**, Viability assay in C4-2R treated with the indicated concentrations of CH. Data are scaled into percentage and normalized to the untreated group (CH = 0), then shown as mean  $\pm$  SD (n = 8). **H**, **I**, Viability assays in 22Rv1 treated with the indicated concentrations of CH for 3 days (H) and 6 days (I). Data are scaled into percentage and normalized to the untreated group, then shown as mean  $\pm$  SD (n = 8). \*,  $p < 0.05$ .

**Figure S3. Elevated GSTM2 confers resistance to SG-ARIs through inhibition of the p38 MAPK pathway.**

**A**, Antioxidant genes by GSEA of C4-2 and C4-2R. The systematic name of the gene set used is M5938. **B**, IB of three common ROS scavengers upon treated with 20 $\mu$ M ENZ for 48 hours. **C**, Viability assay in C4-2 treated with DMSO or 5mM NAC for 3 days. Results are normalized to Ctrl and scaled into percentage, then shown as mean  $\pm$  SD (n = 8). **D**, GSEA of p38 MAPK pathways using ATAC-seq DAPs identified in C4-2R. **E**, Viability assays in LNCaP and C4-2 treated with DMSO or the indicated concentrations of SB for 3 days. Results are normalized to Ctrl and scaled into percentage, then shown as mean  $\pm$  SD (n = 8). **F**, IB of three common antioxidant proteins in C4-2 upon treated with 20 $\mu$ M ENZ, APA or DARO for 48 hours. ns, not significant ( $p > 0.1$ ).

**Figure S4. In vivo and clinical confirmation of GSTM2 and the OS salvage system leading to resistance to SG-ARIs.**

**A, B,** Body weight of nude mice over the treatment period (A), as well as the final body weight upon harvest (B). ns, not significant ( $p > 0.1$ ). **C,** IB to detect the expression of GSTM2 in different treatment group of 22Rv1 xenograft tumors. Three random mice from each group are shown, except for E+N and D+N groups, in which all three mice are shown. The full-length AR (AR-FL) and AR variant 7 (AR-V7) are shown to confirm the authenticity of 22Rv1, which is known to express these two AR isoforms. **D, E,** Spearman correlations of CYP1B1 and GSTM2 in prostate adenocarcinoma samples (C,  $n = 495$ ) and paired normal prostate tissues (D,  $n = 52$ ) from TCGA-PRAD database. **F-I,** Spearman correlations of AhR and GSTM2, CYP1B1 and GSTM2 in prostate adenocarcinoma samples (E and G,  $n = 156$ ) and normal prostate tissues (F and H,  $n = 29$ ) from MSKCC database (Barry et al., Cancer Cell 2010, PMID: 20579941). **J, K,** Spearman correlations of AhR and GSTM2 in castration-resistant prostate cancer (CRPC) samples that are exposed (I,  $n = 128$ ) or naïve (J,  $n = 121$ ) to second-generation ARIs from SU2C/PCF Dream Team database. **L,** Kaplan-Meier curve of remaining probability of time on treatment of all patients ( $n=75$ ) that are medicated with SG-ARIs in Fig. 8G. **M,** Kaplan-Meier curve of survival probability of patients that are medicated with ENZ ( $n = 22$ ) in Fig. 8G. **N-P,** Pathways by GSEA of 7 NRs and 18 Rs treated with ENZ from PNAS 2020 (Alumkal et al., PMID: 32424106). All gene sets are from MSigDB-GSEA, and individual systematic name is: M17243 (M), M20 (N) and M39615 (O).
