# Supplementary material
Source: PubMed Central journal article supplement (PMC9986032)
Supplement: NIHMS1869121-supplement-Supplementary_Methods.pdf [file NIHMS1869121-supplement-Supplementary_Methods.pdf]

## Supplementary materials and methods

Chaohao Li, Jinpeng Liu, Nadia A Lanman, Daheng He, Yue Zhao, Lang Li, Chi Wang and Xiaoqi Liu

### Analysis of ATAC-seq

Paired-end sequencing reads were trimmed using Trimmomatic (v0.39) to remove adapters and low quality bases [1]. Trimmed reads were mapped to the human reference genome assembly GRCh37 (hg19) using Bowtie2 (v2.3.5.1) [2], allowing fragments up to 2kb to be aligned. The alignment results were further filtered by SAMtools to remove reads unmapped, not primary alignment, reads failing platform, reads mapped to mitochondria, reads mapped to ENCODE blacklisted genomic regions and multi-mapped reads [3]. PCR duplicates were removed using Picard (v2.26.8, <https://github.com/broadinstitute/picard>). The high quality alignment bam files were converted to tag bed files and were offset by +4bp for the “+” strand and -5bp for the “-” strand. Peaks were called by MACS2 with the parameter settings “-p 0.01 --extsize 73 -nomodel -B --SPMR”. The coverage track bigwig files were generated with bin size 10 and were normalized by reads per genome coverage using deeptools [4]. Significantly differential accessible regions between C4-2R and C4-2 were identified using the R package DiffBind with edgeR statistical test (q-values < 0.05 and |fold changes| > 2) based on consensus peaks occurring at least three samples [5, 6]. GREAT (v4.0.4) was used to perform the gene set enrichment analysis [7]. All codes are available upon reasonable request.

## **Analysis of RNA-seq**

Sequencing reads were trimmed and filtered using Trimmomatic (v0.39) to remove adapters and low quality bases. Trimmed reads were mapped to the human reference genome assembly GRCh37 (hg19) transcripts annotation using RSEM [8]. RSEM results normalization and differential expression analysis were performed using the R package DESeq2 [9]. Significantly changed genes between C4-2R and C4-2 were determined as  $|\text{fold changes}| \geq 2$  and  $q\text{-values} < 0.05$ . Transcript per million (TPM) were calculated for each gene [10]. Differentially expressed genes common in RNA-seq and ATAC-seq promoter regions were plotted in the heatmap using standardized  $\log_2(\text{TPM}+1)$  values, with red depicting genes above the median level and blue depicting genes below the median level. For heatmap of Fig. 8G, the standardized values were applied k-means algorithm to split the patients into high and low subgroups, then rearranged in the descending order. Ingenuity Pathway analysis (IPA) was performed on differentially expressed genes identified by DESeq2 using QIAGEN IPA toolkit. Genes with  $q\text{-values}$  less than 0.05 were used for the input of pathway analysis. A list of statistically significantly enriched canonical pathways was obtained from IPA. Gene set enrichment analyses (GSEA) were performed on default values calculated with DESeq2. MSigDB (v7.4) gene sets and GSEA software (v.4.1.0) were used in the analyses [11, 12]. The phenotype permutation was used with 1000 permutations, and no collapse was applied. Pathways used were denoted with their unique systematic numbers, and some of them were reported previously [13-19]. For correlation analysis, the TCGA dataset (<https://www.cancer.gov/tcga>, [20]), MSKCC dataset [21], as well as SU2C/PCF dataset [22], were downloaded from cBioportal (<https://www.cbioportal.org>, [23, 24]). The

Spearman's rank-order correlation coefficient and its associated 95% confidence interval were used to quantify the correlation between gene expressions of interest. All codes are available upon reasonable request.

## **qPCR**

Total RNA was extracted with RNeasy Mini Kit (Qiagen, 74104) and quantified by NanoDrop OneC Microvolume UV-Vis Spectrophotometer (Thermo). 1ug RNA was used for reverse transcription with SuperScript IV First-Strand Synthesis System (Thermo, 18091200). qPCR detections were performed with FastStart Universal SYBR Green Master reagents (Sigma, 4913914001) and QuantStudio 5 Real-Time PCR System (Thermo). All experiments were repeated three times and one was shown.

## **Combination Index**

Calculation of Combination Index (CI) was based on the Loewe model [25], which was described in detail here [26]. To simplify the calculation and make it straightforward, we used the 50% CI ( $CI_{50\%}$ ), under which condition 50% inhibition of cell growth was set as the target. The equation to calculate is:  $CI_{50\%} = a/A + b/B$ , where "A" and "B" are the individual  $IC_{50}$  of two drugs, "a" and "b" are the concentration of two drugs used in combination when 50% inhibition is reached. To further simplify our calculation, we assumed "B" was the  $IC_{50}$  of NBD or CH, "b" was set as half  $IC_{50}$  of NBD or CH, then the derived equation is:  $CI_{50\%} = a/A + 0.5$ . The last step was to experimentally determine "a" when half  $IC_{50}$  of NBD or CH was applied as background in the cell proliferation assay. If

$CI_{50\%} = 1$ , it means additive and the two drugs don't interfere with each other; If  $CI_{50\%} > 1$ , it means subadditive or antagonism, which indicates the combination of the two drugs works less efficiently than a single drug; If  $CI_{50\%} < 1$ , it means synergistic and that combination of the two drugs works better.

### **Luciferase assay**

AhR NanoLuc luciferase reporter (pNL[NlucP/XRE/Hygro], CS186808) and control firefly luciferase vector (pGL4.54[luc2/TK], E5061) were purchased from Promega. C4-2 and C4-2R cells were co-transfected with two luciferase vectors in a ratio of 1:50 (firefly:NanoLuc). After 24 hours, the assay was performed with Nano-Glo Dual-Luciferase Reporter Assay System (Promega, N1541) according to manufacturer's instructions. The luminescence was quantified by GloMax Discover plate reader.

### **Flow cytometry analysis of intracellular ROS**

After treatment, cells were cultured with medium containing 20 $\mu$ M CM-DCFDA (Thermo, C6827) for 30mins, followed by one wash with cold PBS. After trypsinization, cells were suspended in room temperature PBS and immediately analyzed by Cytoflex LX flow cytometers (Beckman Coulter) using FITC channel (488ex/525em). Results were managed with FlowJo (v.10.8.1) software. All experiments were repeated three times and one was shown.

## **Xenograft Experiments**

The animal experiments was approved by the University of Kentucky Division of Laboratory Animal Resources. The formulations of drugs are indicated below: ENZ was dissolved in 5% benzyl benzoate and 95% peanut oil; DARO was dissolved in PEG400/propylene glycol/5% glucose (50:30:20); NBD was dissolved in 0.5% methyl cellulose (400cps). After male nude mice (Foxn1<sup>nu</sup>, Jackson Lab Strain #002019) underwent castration surgery,  $2 \times 10^6$  cells were subcutaneously injected. When the average tumor size approached  $100\text{mm}^3$ , the mice were randomized into six groups (6 mice each group) followed with oral gavage of drugs. The treatments for the six groups are shown below: Group 1 was treated with solvent mixture of three drugs (1:1:1) every day; Group 2 was treated with 20mg/kg ENZ every day; Group 3 was treated with 20mg/kg NBD every day; Group 4 was treated with 30mg/kg DARO every day; Group 5 was treated with 20mg/kg ENZ and 20mg/kg NBD every day; Group 6 was treated with 30mg/kg DARO and 20mg/kg NBD every day. Measurement of tumor size was done by digital caliper every two days, and tumor volumes were calculated with the formula:  $V = L \times W^2 \times 0.52$ , where V is volume ( $\text{mm}^3$ ), L is length (mm), W is width (mm). The treatment was stopped when the tumor volume reached  $1000\text{mm}^3$ , then all mice were euthanized. Harvested tumors were fixed with 10% formalin and subject to paraffin-embedded sections.

## **Immunofluorescent staining**

All procedures were carried out using the M.O.M. Basic Kit (Vector Laboratories, BMK-2202) according to the manufacturer's instructions. Briefly, after deparaffinization, citrate-based antigen retrieval (Vector Laboratories, H-3300) and blocking steps, primary antibodies were applied to the slides for 30mins, followed with 10mins application of biotinylated secondary antibodies and 10mins application of DyLight 488 Streptavidin (Vector Laboratories, SA-5488) at 1:200 for 30min. Finally, slides were mounted with VECTASHIELD HardSet containing DAPI (Vector Laboratories, H-1500). Images were captured by Nikon confocal microscope and managed by Fiji software [27].

### **Hematoxylin and eosin staining.**

After deparaffinization and citrate-based antigen retrieval, tumor slides were sequentially stained with hematoxylin and eosin. In brief, tumor sections were immersed in the hematoxylin solution for 10 seconds, and washed with tap water until the water was clear. Next, slides were immersed in eosin solution for 30 seconds and washed with tap water until the water was clear. Finally, slides were mounted with Antifade Mounting Medium (Vector Laboratories, H-1000), followed by image acquisition by Nikon confocal microscope and management by Fiji software.

### **Survival analysis**

All patients' survival information were downloaded from cBioportal, except for the data from PNAS 2019 (Alumkal et al., [28]), which is the courtesy of Dr. Joshi Alumkal from

University of Michigan. Kaplan-Meier survival curves and remaining time on treatment curves were generated by GraphPad Prism 8.

**Table 1. List of antibodies**

| Name                              | Company             | Cat. #    | Source | Application | ratio   |
|-----------------------------------|---------------------|-----------|--------|-------------|---------|
| AhR                               | Cell Signaling      | 83200     | Rb     | IB          | 1:1000  |
| $\beta$ -actin                    | Cell Signaling      | 8457      | Rb     | IB          | 1:5000  |
| CAT                               | Cell Signaling      | 12980     | Rb     | IB          | 1:1000  |
| Cleaved Caspase 3                 | Cell Signaling      | 9664      | Rb     | IF          | 1:200   |
| Cleaved PARP                      | Cell Signaling      | 9546      | Ms     | IB          | 1:1000  |
| GAPDH                             | Cell Signaling      | 5174      | Rb     | IB          | 1:10000 |
| GSTM1                             | Santa Cruz          | sc-517262 | Ms     | IB          | 1:500   |
| GSTM2                             | Santa Cruz          | sc-376486 | Ms     | IB          | 1:500   |
| GSTP1                             | Santa Cruz          | sc-66000  | Ms     | IB          | 1:500   |
| HA-tag                            | Cell Signaling      | 3724      | Rb     | IB          | 1:1000  |
| p38 MAPK                          | Cell Signaling      | 9212      | Rb     | IB          | 1:1000  |
| phospho-p38 MAPK                  | Cell Signaling      | 9211      | Rb     | IB          | 1:1000  |
| Ki-67                             | Abcam               | ab15580   | Rb     | IF          | 1:200   |
| SOD1                              | Cell Signaling      | 2770      | Rb     | IB          | 1:1000  |
| SOD2                              | Cell Signaling      | 13141     | Rb     | IB          | 1:1000  |
| HRP-linked goat anti-Rabbit IgG   | Cell Signaling      | 7074      | Gt     | IB          | 1:3000  |
| HRP-linked goat anti-Mouse IgG    | Cell Signaling      | 7076      | Gt     | IB          | 1:3000  |
| biotinylated goat anti-rabbit IgG | Vector Laboratories | BA-1000   | Gt     | IF          | 1:200   |

**Table 2. List of primers**

| Name   | Forward                | Reverse                 | Tm | Product Length | Ref  |
|--------|------------------------|-------------------------|----|----------------|------|
| CYP1A1 | GGTCAAGGAGCACTACAAAACC | TGGACATTGGCGTTCTCATCC   | 60 | 108bp          | [29] |
| CYP1A2 | TACTTGGAGGCCTTCATCCTG  | TTACGAAGACACAGCATTCTTGG | 59 | 130bp          | [30] |
| GSTM2  | GTATGCAGCTGGCCAAACTC   | GAGATGAAGTCCTTCAGGTTTGG | 59 | 235bp          |      |

**Table 3. List of chemicals**

| Name         | Company     | Cat. # | Solvent |
|--------------|-------------|--------|---------|
| Enzalutamide | Selleckchem | S1250  | DMSO    |
| Apalutamide  | Selleckchem | S2840  | DMSO    |
| Darolutamide | Selleckchem | S7559  | DMSO    |

|           |             |           |      |
|-----------|-------------|-----------|------|
| NBDHEX    | MCE         | HY-135318 | DMSO |
| CH-223191 | Selleckchem | S7711     | DMSO |
| CM-DCFDA  | Thermo      | C6827     | DMSO |

**Table 4. List of shRNAs**

| <b>Name</b> | <b>Cat. #</b>  | <b>Vector</b> | <b>Resistance</b> | <b>Targeting Region</b> | <b>Usage</b> |
|-------------|----------------|---------------|-------------------|-------------------------|--------------|
| shControl   | SHC001V        | pLKO.1-puro   | Puromycin         | /                       | C4-2R        |
| shAhR #1    | TRCN0000245285 | pLKO.1-puro   | Puromycin         | CDS                     | C4-2R        |
| shAhR #2    | TRCN0000245287 | pLKO.1-puro   | Puromycin         | 3'-UTR                  | C4-2R        |
| ShGSTM2 #1  | TRCN0000151859 | pLKO.1-puro   | Puromycin         | 3'-UTR                  | C4-2R        |
| ShGSTM2 #2  | TRCN0000154400 | pLKO.1-puro   | Puromycin         | CDS                     | C4-2R        |



## References

1. Bolger, A.M., M. Lohse, and B. Usadel, *Trimmomatic: a flexible trimmer for Illumina sequence data*. *Bioinformatics*, 2014. **30**(15): p. 2114-20.
2. Langmead, B. and S.L. Salzberg, *Fast gapped-read alignment with Bowtie 2*. *Nat Methods*, 2012. **9**(4): p. 357-9.
3. Li, H., et al., *The Sequence Alignment/Map format and SAMtools*. *Bioinformatics*, 2009. **25**(16): p. 2078-9.
4. Ramírez, F., et al., *deepTools2: a next generation web server for deep-sequencing data analysis*. *Nucleic Acids Res*, 2016. **44**(W1): p. W160-5.
5. Ross-Innes, C.S., et al., *Differential oestrogen receptor binding is associated with clinical outcome in breast cancer*. *Nature*, 2012. **481**(7381): p. 389-93.
6. Robinson, M.D., D.J. McCarthy, and G.K. Smyth, *edgeR: a Bioconductor package for differential expression analysis of digital gene expression data*. *Bioinformatics*, 2010. **26**(1): p. 139-40.
7. McLean, C.Y., et al., *GREAT improves functional interpretation of cis-regulatory regions*. *Nat Biotechnol*, 2010. **28**(5): p. 495-501.
8. Li, B. and C.N. Dewey, *RSEM: accurate transcript quantification from RNA-Seq data with or without a reference genome*. *BMC Bioinformatics*, 2011. **12**: p. 323.
9. Love, M.I., W. Huber, and S. Anders, *Moderated estimation of fold change and dispersion for RNA-seq data with DESeq2*. *Genome Biol*, 2014. **15**(12): p. 550.

10. Wagner, G.P., K. Kin, and V.J. Lynch, *Measurement of mRNA abundance using RNA-seq data: RPKM measure is inconsistent among samples*. *Theory Biosci*, 2012. **131**(4): p. 281-5.
11. Mootha, V.K., et al., *PGC-1 $\alpha$ -responsive genes involved in oxidative phosphorylation are coordinately downregulated in human diabetes*. *Nature Genetics*, 2003. **34**: p. 267.
12. Subramanian, A., et al., *Gene set enrichment analysis: a knowledge-based approach for interpreting genome-wide expression profiles*. *Proc Natl Acad Sci U S A*, 2005. **102**(43): p. 15545-50.
13. Liberzon, A., et al., *The Molecular Signatures Database (MSigDB) hallmark gene set collection*. *Cell Syst*, 2015. **1**(6): p. 417-425.
14. Fabregat, A., et al., *Reactome diagram viewer: data structures and strategies to boost performance*. *Bioinformatics*, 2018. **34**(7): p. 1208-1214.
15. Schaefer, C.F., et al., *PID: the Pathway Interaction Database*. *Nucleic Acids Res*, 2009. **37**(Database issue): p. D674-9.
16. Ashburner, M., et al., *Gene ontology: tool for the unification of biology. The Gene Ontology Consortium*. *Nat Genet*, 2000. **25**(1): p. 25-9.
17. *The Gene Ontology resource: enriching a GOld mine*. *Nucleic Acids Res*, 2021. **49**(D1): p. D325-d334.
18. Pico, A.R., et al., *WikiPathways: pathway editing for the people*. *PLoS Biol*, 2008. **6**(7): p. e184.

19. Phong, M.S., et al., *p38 mitogen-activated protein kinase promotes cell survival in response to DNA damage but is not required for the G(2) DNA damage checkpoint in human cancer cells*. Mol Cell Biol, 2010. **30**(15): p. 3816-26.
20. *The Molecular Taxonomy of Primary Prostate Cancer*. Cell, 2015. **163**(4): p. 1011-25.
21. Taylor, B.S., et al., *Integrative genomic profiling of human prostate cancer*. Cancer Cell, 2010. **18**(1): p. 11-22.
22. Abida, W., et al., *Genomic correlates of clinical outcome in advanced prostate cancer*. Proc Natl Acad Sci U S A, 2019. **116**(23): p. 11428-11436.
23. Gao, J., et al., *Integrative analysis of complex cancer genomics and clinical profiles using the cBioPortal*. Sci Signal, 2013. **6**(269): p. p1.
24. Cerami, E., et al., *The cBio cancer genomics portal: an open platform for exploring multidimensional cancer genomics data*. Cancer Discov, 2012. **2**(5): p. 401-4.
25. Loewe, S., *The problem of synergism and antagonism of combined drugs*. Arzneimittelforschung, 1953. **3**(6): p. 285-90.
26. Tallarida, R.J., *Quantitative methods for assessing drug synergism*. Genes Cancer, 2011. **2**(11): p. 1003-8.
27. Schindelin, J., et al., *Fiji: an open-source platform for biological-image analysis*. Nat Methods, 2012. **9**(7): p. 676-82.
28. Alumkal, J.J., et al., *Transcriptional profiling identifies an androgen receptor activity-low, stemness program associated with enzalutamide resistance*. Proc Natl Acad Sci U S A, 2020. **117**(22): p. 12315-12323.

29. Vorrink, S.U., D.R. Hudachek, and F.E. Domann, *Epigenetic determinants of CYP1A1 induction by the aryl hydrocarbon receptor agonist 3,3',4,4',5-pentachlorobiphenyl (PCB 126)*. Int J Mol Sci, 2014. **15**(8): p. 13916-31.
30. Koe, X.F., et al., *Cytochrome P450 induction properties of food and herbal-derived compounds using a novel multiplex RT-qPCR in vitro assay, a drug-food interaction prediction tool*. Food Sci Nutr, 2014. **2**(5): p. 500-20.
