# Supplementary material
Source: PubMed Central journal article supplement (PMC9986032)
Supplement: NIHMS1869121-supplement-Supplementary_Table_1_Legend.pdf [file NIHMS1869121-supplement-Supplementary_Table_1_Legend.pdf]

**Supplementary Table 1. Differentially accessible peaks of ATAC-seq.**

Total 963 peaks identified in ATAC-seq, including their genomic locations and associated genes.
