# Supplementary material
Source: PubMed Central journal article supplement (PMC9986032)
Supplement: NIHMS1869121-supplement-Supplementary_Table_2_Legend.pdf [file NIHMS1869121-supplement-Supplementary_Table_2_Legend.pdf]

**Supplementary Table 2. Transcripts Per Million values of overlapped genes between RNA-seq and ATAC-seq (promoter).**

Total 32 overlapped genes between two sequencings. The table is sorted by the descending order of log<sub>2</sub>FoldChange.
